# Supplementary material
Source: PubMed Central journal article supplement (PMC9597666)
Supplement: NIHMS1842066-supplement-1.pdf [file NIHMS1842066-supplement-1.pdf]

**Cell Reports, Volume 41**

**Supplemental information**

**Maternal gut microbiota mediate  
intergenerational effects of high-fat  
diet on descendant social behavior**

**Claudia M. Di Gesù, Lisa M. Matz, Ian J. Bolding, Robert Fultz, Kristi L. Hoffman, Antonella Marino Gammazza, Joseph F. Petrosino, and Shelly A. Buffington**

Supplemental Figure 1 (Di Gesù, Matz et al.)

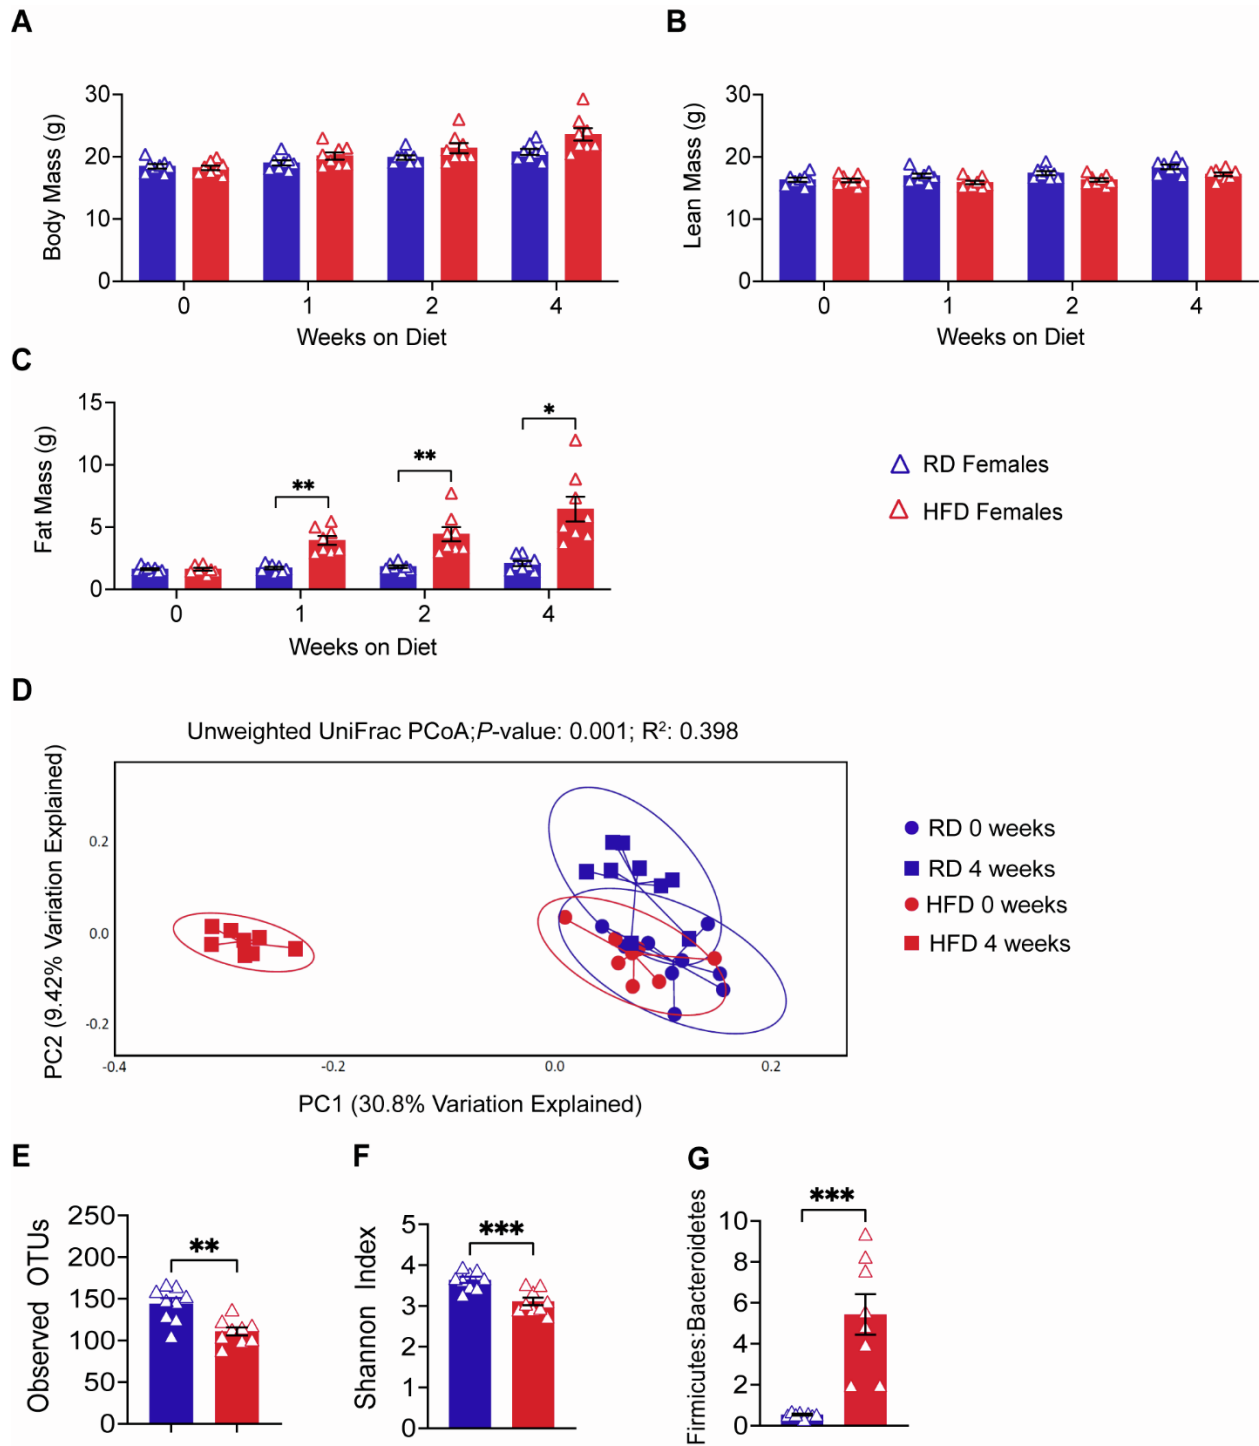

Figure S1. Four weeks HFD-feeding increases fat mass and shifts gut microbiome composition in female mice.

Related to Figure 1. (A) RD- and HFD-fed female total body mass is not significantly different at four weeks on diet (week 0:  $t(14) = 0.4557, p = 0.9859$ ; week 1:  $t(12.45) = 1.574, p = 0.4545$ ; week 2:  $t(9.588) = 1.717, p = 0.3951$ ;

week 4:  $t(9.979) = 2.504$ ,  $p = 0.1194$ ). **(B)** No significant differences in lean mass were observed between RD- and HFD-fed females at four weeks on diet (week 0:  $t(13.94) = 0.2018$ ,  $p = 0.9994$ ; week 1:  $t(13.45) = 2.272$ ,  $p = 0.151$ ; week 2:  $t(13.76) = 2.451$ ,  $p = 0.1082$ ; week 4:  $t(13.26) = 2.451$ ,  $p = 0.1104$ ). **(C)** HFD-fed mice showed a significant increase in fat mass within one week on diet that was sustained at four weeks on diet (week 0:  $t(12.42) = 0.04358$ ,  $p > 0.9999$ ; week 1:  $t(8.111) = 6.061$ ,  $p = 0.0011$ ; week 2:  $t(7.51) = 4.518$ ,  $p = 0.0091$ ; week 4:  $t(7.634) = 4.287$ ,  $p = 0.0118$ ) as determined by a mixed-effects model (see Materials and Methods). **(D)** Principal coordinate analysis (PCoA) of Unweighted UniFrac distances from the averaged rarefied 16S rRNA gene amplicon sequencing dataset (3,341 reads/sample,  $n=1,000$  rarefactions) reveal a significant shift in maternal gut microbial ecology within one week on high-fat diet that is maintained at four weeks on diet. ( $p=0.001, R^2 = 0.398$ ). **(E–F)** Alpha diversity metrics reveal a statistically significant loss of microbial diversity in HFD compared to RD dams, as measured by **(E)** observed OTUs ( $t(16) = 3.942$ ,  $p = 0.0012$ ) and **(F)** Shannon diversity index ( $t(16) = 4.412$ ,  $p = 0.0004$ ). **(G)** Phylum-level changes, characterized by a significant increase in the *Firmicutes:Bacteroidetes* ratio are evident after four weeks on diet (Mann-Whitney  $U = 0$ ,  $p = 0.0002$ ). Bar graphs show mean  $\pm$  SEM with individual data points representing biological replicates.  $N = 8–9$  subjects per group.

Supplemental Figure 2 (Di Gesù, Matz et al.)

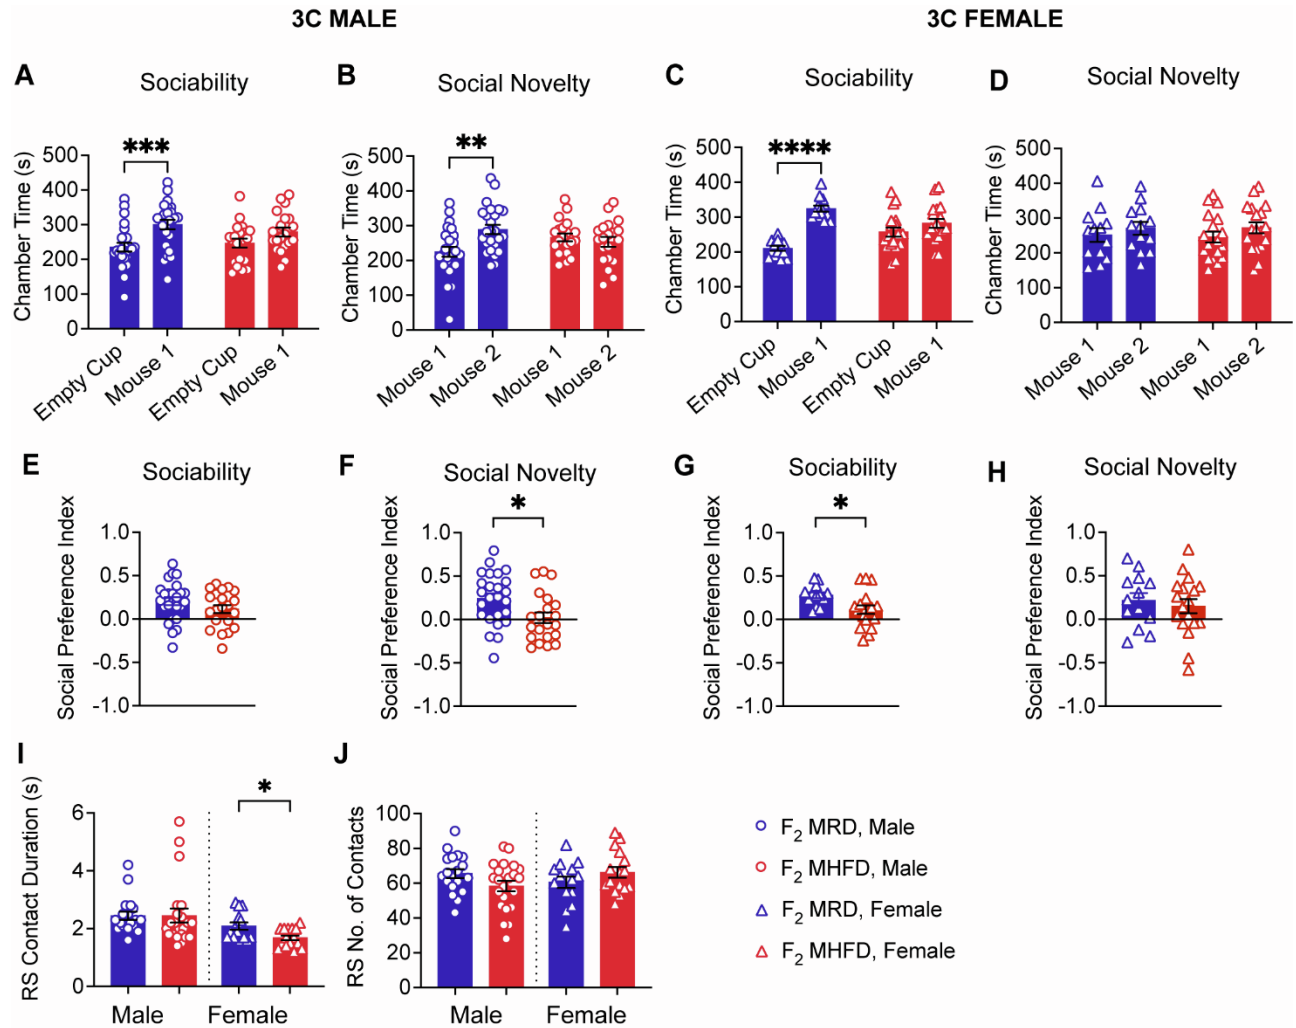

**Figure S2. Automated 3C time in chamber data corroborate MHFD-descendant F<sub>2</sub> male social deficits**

**measured by trained observers. Related to Figure 1.** 3C ANY-maze chamber times for **(A, B)** male and **(C, D)**

female sociability (Male MRD F<sub>2</sub>:  $t(86) = 3.740$ ,  $p = 0.0007$ ; Male MHFD F<sub>2</sub>:  $t(86) = 1.654$ ,  $p = 0.1932$ ; Female MRD F<sub>2</sub>:  $t(56) = 6.277$ ,  $p < 0.0001$ ; Female MHFD F<sub>2</sub>:  $t(56) = 1.473$ ,  $p = 0.2713$ ) and preference for social novelty

(Male MRD F<sub>2</sub>:  $t(86) = 3.534$ ,  $p = 0.0013$ ; Male MHFD F<sub>2</sub>:  $t(86) = 0.6284$ ,  $p = 0.7804$ ; Female MRD F<sub>2</sub>:  $t(56) = 0.7172$ ,  $p = 0.7257$ ; Female MHFD F<sub>2</sub>:  $t(56) = 1.178$ ,  $p = 0.4283$ ), respectively. Social Preference Index for **(E, F)**

male and **(G, H)** female sociability (Male MHFD vs MRD F<sub>2</sub>:  $t(43) = 1.4$ ,  $p = 0.1686$ ; Female MHFD vs MRD F<sub>2</sub>:

$t(28) = 3.079$ ,  $p = 0.0046$ ) and preference for social novelty (Male MHFD vs MRD F<sub>2</sub>:  $t(43) = 2.901$ ,  $p = 0.0058$ ;

Female MHFD vs MRD F<sub>2</sub>:  $t(8) = 0.8534$ ,  $p = 0.4182$ ), respectively. F<sub>2</sub> male and female F<sub>2</sub> reciprocal social **(I)**

contact duration (Male MHFD vs MRD F<sub>2</sub>: Mann-Whitney U = 157,  $p = 0.1763$ ; Female MHFD vs MRD F<sub>2</sub>: Mann-

Whitney  $U = 57.50$ ,  $p = 0.0214$ ) and (**J**) number of contacts (Male MHFD vs MRD  $F_2: t(39) = 1.796$ ,  $p = 0.0803$ ; Female MHFD vs MRD  $F_2: t(28) = 1.258$ ,  $p = 0.2188$ ). Bar graphs show mean  $\pm$  SEM with individual data points representing biological replicates. A–H,  $N = 13$ – $25$  subjects per group, I and J,  $N = 14$ – $22$  subject pairs per group.

Supplemental Figure 3 (Di Gesù, Matz et al.)

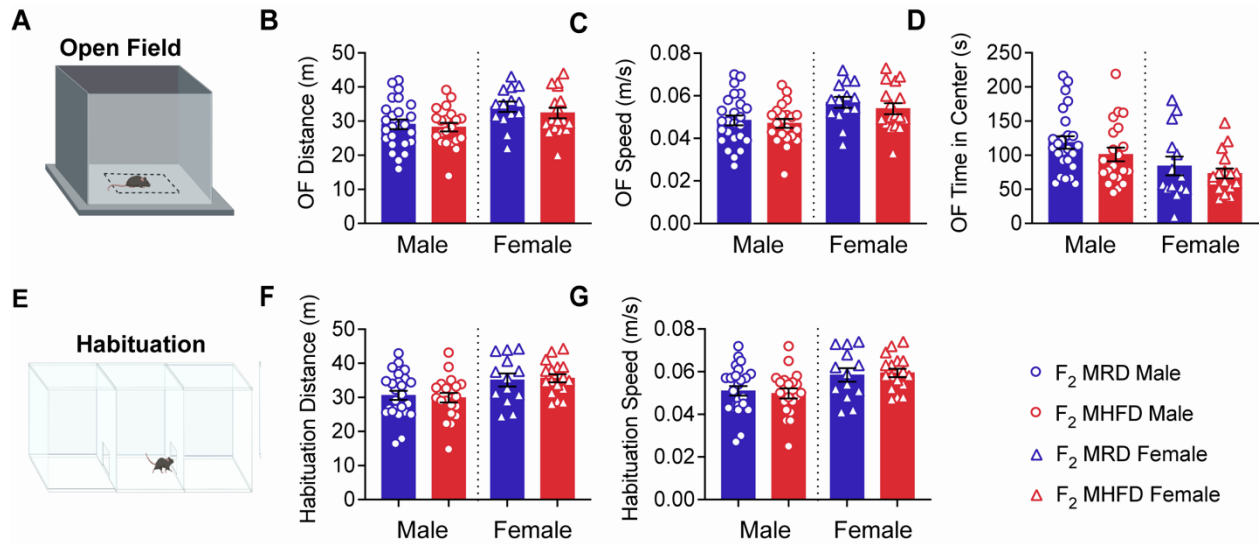

**Figure S3. Anxiety-like behavior and locomotor activity are unaltered in MHFD-descendant F<sub>2</sub> offspring.**

**Related to Figure 1.** (A) Open field (OF) schematic. No statistically significant differences in OF (B) distance traveled (Males:  $t(11) = 0.3246$ ,  $p = 0.7516$ ; Females:  $t(8) = 0.7396$ ,  $p = 0.4807$ ), (C) speed (Males:  $t(11) = 0.3431$ ,  $p = 0.7380$ ; Females:  $t(8) = 0.7397$ ,  $p = 0.4806$ , females), or (D) time spent in center (Males:  $t(11) = 1.018$ ,  $p = 0.3307$ ; Females:  $t(8) = 0.6608$ ,  $p = 0.5273$ , females) were observed between cohorts. (E) Schematic of the 3C habituation stage. Neither (F) distance traveled (Male MRD vs MHFD:  $t(43) = 0.3626$ ,  $p = 0.7186$ ; Female MRD vs MHFD:  $t(8) = 0.004881$ ,  $p = 0.9962$ ) or (G) speed (Male MRD vs MHFD:  $t(43) = 0.3706$ ,  $p = 0.7128$ ; Female MRD vs MHFD:  $t(8) = 0.01752$ ,  $p = 0.9865$ ) differed between maternal diet lineages in the habituation phase of the 3C task. Bar graphs show mean  $\pm$  SEM with individual data points representing biological replicates. A–H, N = 13 – 25 subjects per group; I and J, N = 14–22 subject pairs per group.

Supplemental Figure 4 (Di Gesù, Matz et al.)

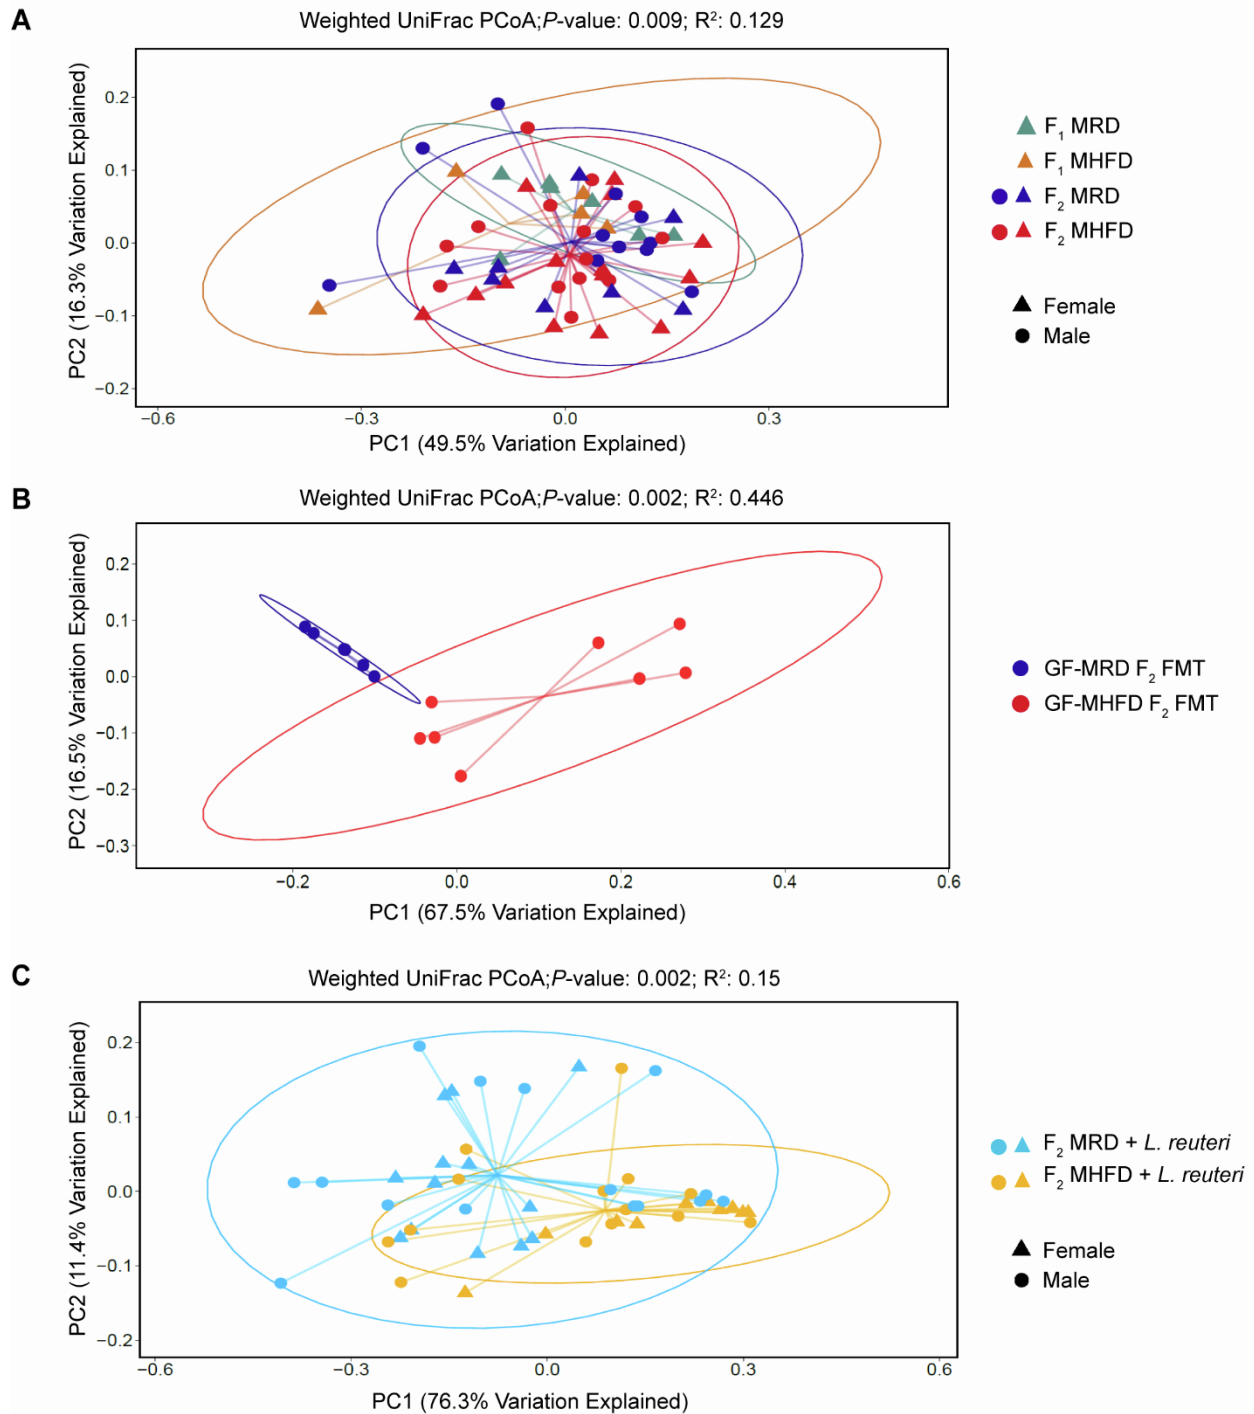

**Figure S4. Weighted UniFrac analysis of beta diversity in  $F_1$  and  $F_2$  cohorts  $\pm$  *L. reuteri*, MRD or MHFD  $F_2$ -FMT colonized males. Related to Figures 2, 4, and 5. (A) Principal coordinate analysis (PCoA) of Weighted UniFrac distances from the averaged rarefied 16S rRNA gene amplicon sequencing dataset (8,310 reads/sample;  $n=1,000$  rarefactions) revealed statistically significant clusters based on diet and generation ( $p = 0.006$ ,  $R^2 = 0.129$ ).**

**(B)** Principal coordinate analysis (PCoA) of Weighted UniFrac distances from the averaged rarefied 16S rRNA gene amplicon sequencing dataset (3,370 reads/sample; n=1,000 rarefactions) revealed statistically significant clusters based on diet ( $p = 0.002$ ,  $R^2 = 0.446$ ). **(C)** Principal coordinate analysis (PCoA) of Weighted UniFrac distances from the averaged rarefied 16S rRNA gene amplicon sequencing dataset (5,508 reads/sample; n=1,000 rarefactions) revealed statistically significant clusters based on diet ( $p = 0.002$ ,  $R^2 = 0.15$ ). A, N = 5–15 subjects per group; B, N = 7–8 subjects per group; C, N = 24–28 subjects per group. Data points represent biological replicates



Supplemental Figure 5 (Di Gesù, Matz et al.)

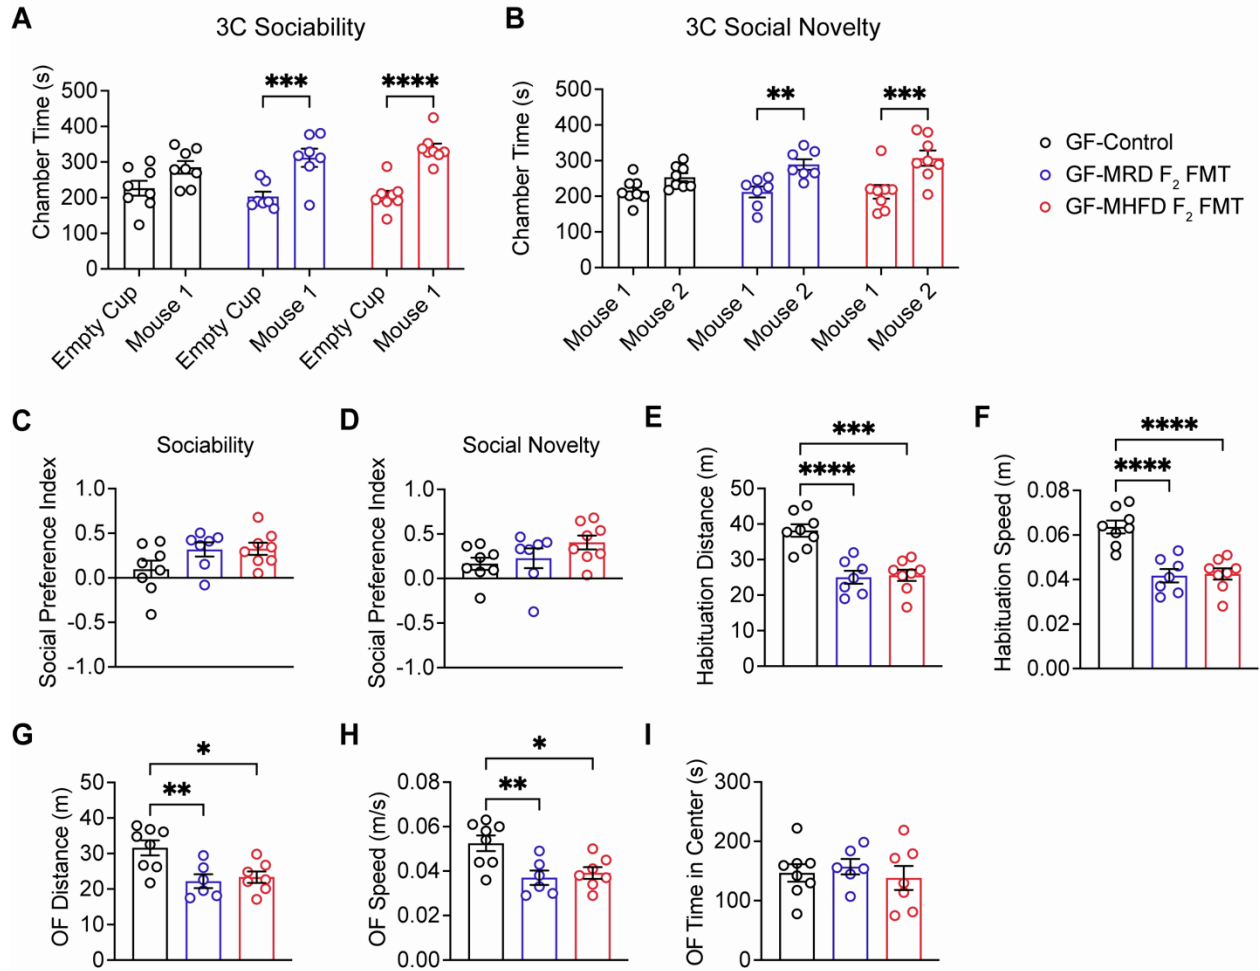

**Figure S5. Automated 3C chamber times and locomotor data in germ-free (GF)-control, MRD F<sub>2</sub>-FMT colonized, or MHFD F<sub>2</sub>-FMT colonized males. Related to Figure 4.** Automated ANY-maze 3C chamber times for GF-Control and MRD F<sub>2</sub>- or MHFD F<sub>2</sub>-FMT recipient (**A**) sociability (GF-control:  $t(40) = 2.336$ ,  $p = 0.0719$ ; MRD F<sub>2</sub>-FMT:  $t(40) = 4.053$ ,  $p = 0.0007$ ; MHFD F<sub>2</sub>-FMT:  $t(40) = 5.294$ ,  $p < 0.0001$ ) and (**B**) preference for social novelty (GF-control:  $t(40) = 1.698$ ,  $p = 0.2646$ ; MRD F<sub>2</sub>-FMT:  $t(40) = 3.3221$ ,  $p = 0.0076$ ; MHFD F<sub>2</sub>-FMT:  $t(40) = 4.211$ ,  $p = 0.0004$ ). Social preference index for F<sub>2</sub> male (**C**) sociability (GF-control vs MRD-FMT:  $q(20) = 2.66$ ,  $p = 0.1701$ ; GF-control vs MHFD-FMT:  $q(20) = 2.85$ ,  $p = 0.1343$ ; MRD F<sub>2</sub>-FMT vs MHFD F<sub>2</sub>-FMT:  $q(20) = 0.09341$ ,  $p = 0.9976$ ) and (**D**) social novelty (GF-control vs MRD F<sub>2</sub>-FMT:  $q(20) = 0.7191$ ,  $p = 0.8681$ ; GF-control vs MHFD F<sub>2</sub>-FMT:  $q(20) = 2.855$ ,  $p = 0.1335$ ; MRD F<sub>2</sub>-FMT vs MHFD F<sub>2</sub>-FMT:  $q(20) = 2.039$ ,  $p = 0.3393$ ). During 3C habituation, GF-control mice travel significantly farther than their colonized counterparts, as seen in (**E**) distance

(GF-control vs MRD F<sub>2</sub>-FMT:  $q(20) = 7.551, p < 0.0001$ ; GF-control vs MHFD F<sub>2</sub>-FMT:  $q(20) = 7.483, p = 0.0001$ ; MRD F<sub>2</sub>-FMT vs MHFD F<sub>2</sub>-FMT:  $q(20) = 0.3218, p = 0.9719$ ) and (**F**) speed (GF-control vs MRD F<sub>2</sub>-FMT:  $q(20) = 7.687, p < 0.0001$ ; GF-control vs MHFD F<sub>2</sub>-FMT:  $q(20) = 7.671, p < 0.0001$ ; MRD F<sub>2</sub>-FMT vs MHFD F<sub>2</sub>-FMT:  $q(20) = 0.2757, p = 0.9793$ ) compared to MRD F<sub>2</sub>- or MHFD F<sub>2</sub>-FMT males, as determined by one-way ANOVA with Tukey's correction for multiple comparisons. In the open field test, GF-control mice have significantly higher (**G**) distance traveled (GF-control vs MRD F<sub>2</sub>-FMT:  $q(18) = 4.821, p = 0.0084$ ; GF-control vs MHFD F<sub>2</sub>-FMT:  $q(18) = 4.425, p = 0.0152$ ; MRD F<sub>2</sub>-FMT vs MHFD F<sub>2</sub>-FMT:  $q(18) = 0.5635, p = 0.9166$ ) and (**H**) speed (GF-C vs MRD F<sub>2</sub>-FMT:  $q(18) = 4.797, p = 0.0087$ ; GF-control vs MHFD F<sub>2</sub>-FMT:  $q(18) = 4.313, p = 0.018$ ; MRD F<sub>2</sub>-FMT vs MHFD F<sub>2</sub>-FMT:  $q(18) = 0.6437, p = 0.8927$ ), but not (**I**) time spent in center (GF-control vs MRD F<sub>2</sub>-FMT:  $q(18) = 0.6256, p = 0.8984$ ; GF-control vs MHFD F<sub>2</sub>-FMT:  $q(18) = 0.5261, p = 0.9269$ ; MRD F<sub>2</sub>-FMT vs MHFD F<sub>2</sub>-FMT:  $q(18) = 1.097, p = 0.7224$ ) compared to MRD F<sub>2</sub>- or MHFD F<sub>2</sub>-FMT males, as determined by one-way ANOVA with Tukey's correction for multiple comparisons. Bar graphs show mean  $\pm$  SEM with individual data points representing biological replicates. A–F, N = 7–8 subjects per group; G–I, N = 6–8.

Supplemental Figure 6 (Di Gesù, Matz et al.)

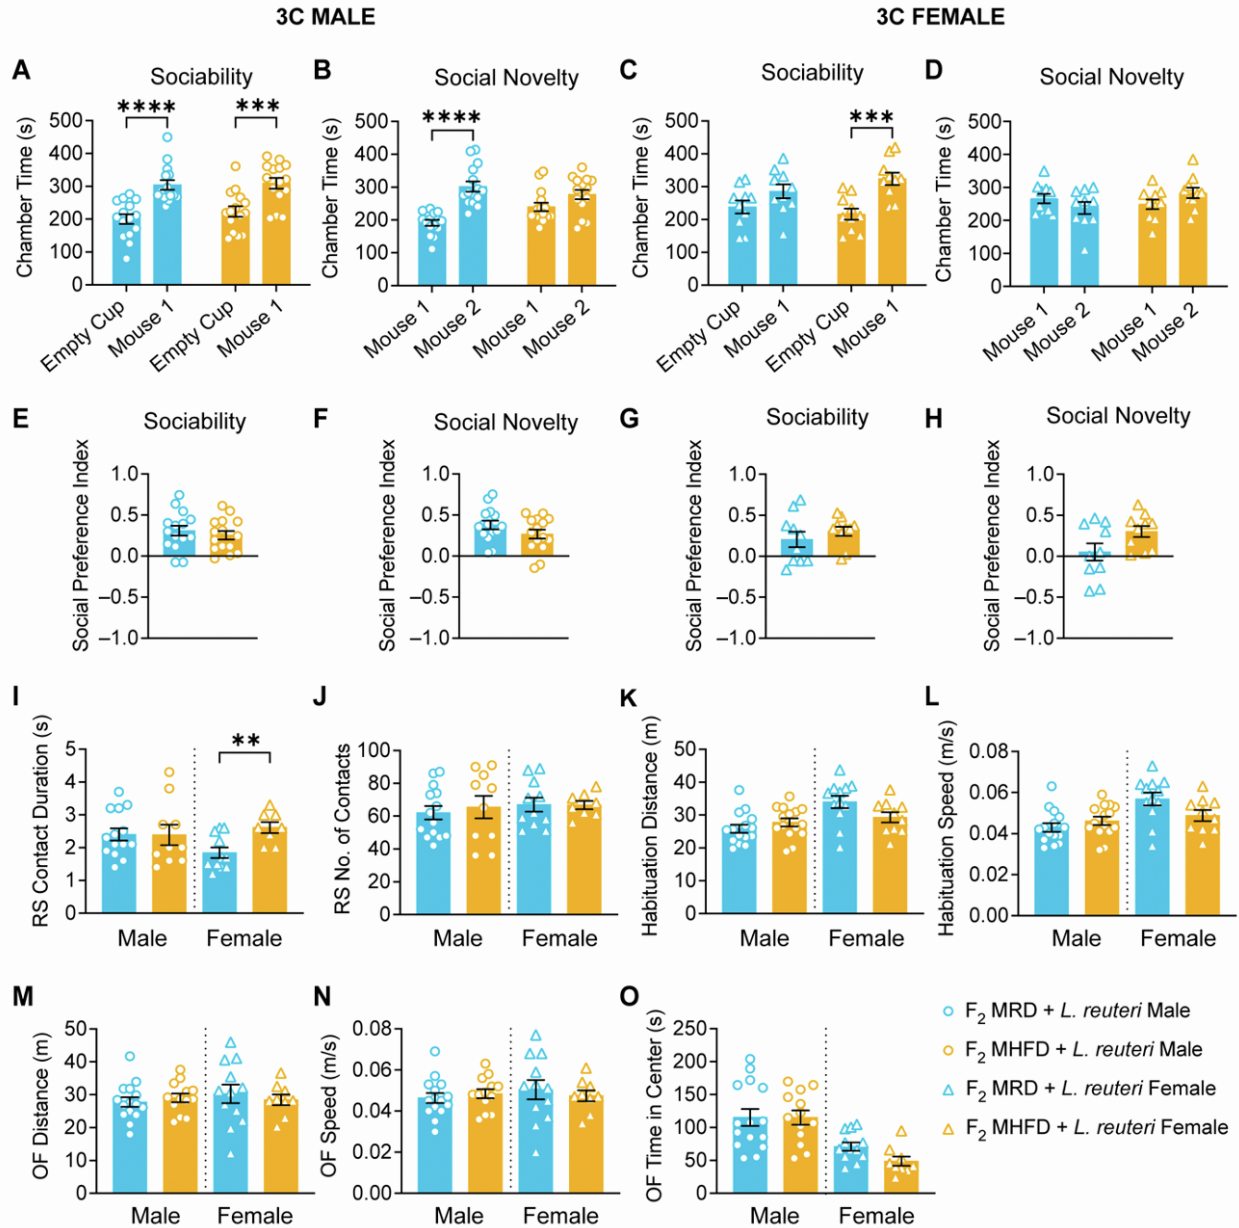

**Figure S6. *L. reuteri*-treated MRD- and MHFD-descendant F<sub>2</sub> mice do not display anxiety-like behavior or abnormal locomotor activity. Related to Figure 6.** 3C ANY-maze automated chamber times for F<sub>2</sub> + *L. reuteri* (A, B) male and (C, D) female sociability (Male MRD F<sub>2</sub> + *L. reuteri*:  $t(56) = 4.783$ ,  $p < 0.0001$ ; Male MHFD F<sub>2</sub> + *L. reuteri*:  $t(56) = 3.972$ ,  $p = 0.0004$ ; Female MRD F<sub>2</sub> + *L. reuteri*:  $t(36) = 1.747$ ,  $p = 0.1703$ ; Female MHFD F<sub>2</sub> + *L. reuteri*:  $t(36) = 3.952$ ,  $p = 0.0007$ ) and preference for social novelty (Male MRD F<sub>2</sub> + *L. reuteri*:  $t(56) = 5.969$ ,  $p < 0.0001$ ; Male MHFD F<sub>2</sub> + *L. reuteri*:  $t(56) = 2.047$ ,  $p = 0.0887$ ; Female MRD F<sub>2</sub> + *L. reuteri*:  $t(36) = 1.276$ ,  $p =$

0.3762; Female MHFD  $F_2 + L. reuteri$ :  $t(36) = 1.549$ ,  $p = 0.2435$ ), respectively, in the 3C task. Social preference indices for **(E, F)** male and **(G, H)** female sociability (Male MHFD vs MRD  $F_2$ :  $t(28) = 0.6876$ ,  $p = 0.4973$ ; Female MHFD vs MRD  $F_2$ :  $t(4) = 0.7951$ ,  $p = 0.4711$ ) and social novelty (Male MHFD vs MRD  $F_2$ :  $t(5) = 1.313$ ,  $p = 0.2463$ ; Female MHFD vs MRD  $F_2$ :  $t(4) = 1.497$ ,  $p = 0.2088$ ).  $F_2 + L. reuteri$  male and female reciprocal social **(I)** contact duration (Male MHFD  $F_2 + L. reuteri$  vs MRD  $F_2 + L. reuteri$ :  $t(22) = 0.02922$ ,  $p = 0.9770$ ; Female MHFD  $F_2 + L. reuteri$  vs MRD  $F_2 + L. reuteri$ :  $t(17) = 3.261$ ,  $p = 0.0046$ ) and **(J)** number of contacts (Male MHFD  $F_2 + L. reuteri$  vs MRD  $F_2 + L. reuteri$ :  $t(22) = 0.4516$ ,  $p = 0.6559$ ; Female MHFD  $F_2 + L. reuteri$  vs MRD  $F_2 + L. reuteri$ :  $t(17) = 0.04579$ ,  $p = 0.9640$ ). Neither male nor female  $F_2$  3C habituation **(K)** distance (Male MHFD  $F_2 + L. reuteri$  vs MRD  $F_2 + L. reuteri$ :  $t(5) = 0.9683$ ,  $p = 0.3774$ ; Female MHFD  $F_2 + L. reuteri$  vs MRD  $F_2 + Lr$ :  $t(18) = 2.064$ ,  $p = 0.0537$ ) or **(L)** speed (Male MHFD  $F_2 + L. reuteri$  vs MRD  $F_2 + L. reuteri$ :  $t(5) = 0.9711$ ,  $p = 0.3761$ ; Female MHFD  $F_2 + L. reuteri$  vs MRD  $F_2 + L. reuteri$ :  $t(18) = 2.097$ ,  $p = 0.0504$ ) differ between diets. Open field **(M)** distance (Male MHFD  $F_2 + L. reuteri$  vs MRD  $F_2 + L. reuteri$ :  $t(26) = 0.6324$ ,  $p = 0.5326$ ; Female MHFD  $F_2 + L. reuteri$  vs MRD  $F_2 + L. reuteri$ :  $t(4) = 0.2862$ ,  $p = 0.7890$ ), **(N)** speed (Male MHFD  $F_2 + L. reuteri$  vs MRD  $F_2 + L. reuteri$ :  $t(26) = 0.6384$ ,  $p = 0.5288$ ; Female MHFD  $F_2 + L. reuteri$  vs MRD  $F_2 + L. reuteri$ :  $t(4) = 0.2752$ ,  $p = 0.7968$ ), and **(O)** time spent in the center (Male MHFD  $F_2 + L. reuteri$  vs. MRD  $F_2 + L. reuteri$ :  $t(5) = 0.1939$ ,  $p = 0.8539$ ; Female MHFD  $F_2 + L. reuteri$  vs. MRD  $F_2 + L. reuteri$ :  $t(4) = 2.024$ ,  $p = 0.1129$ ) did not significantly differ between cohorts. Bar graphs show mean  $\pm$  SEM with individual data points representing biological replicates. A–H, K, and L, N = 10–15 subjects per group; I and J, N = 8–14 pairs per group; M–O, N = 9–15 subjects per group.

Supplemental Figure 7 (Di Gesù, Matz et al.)

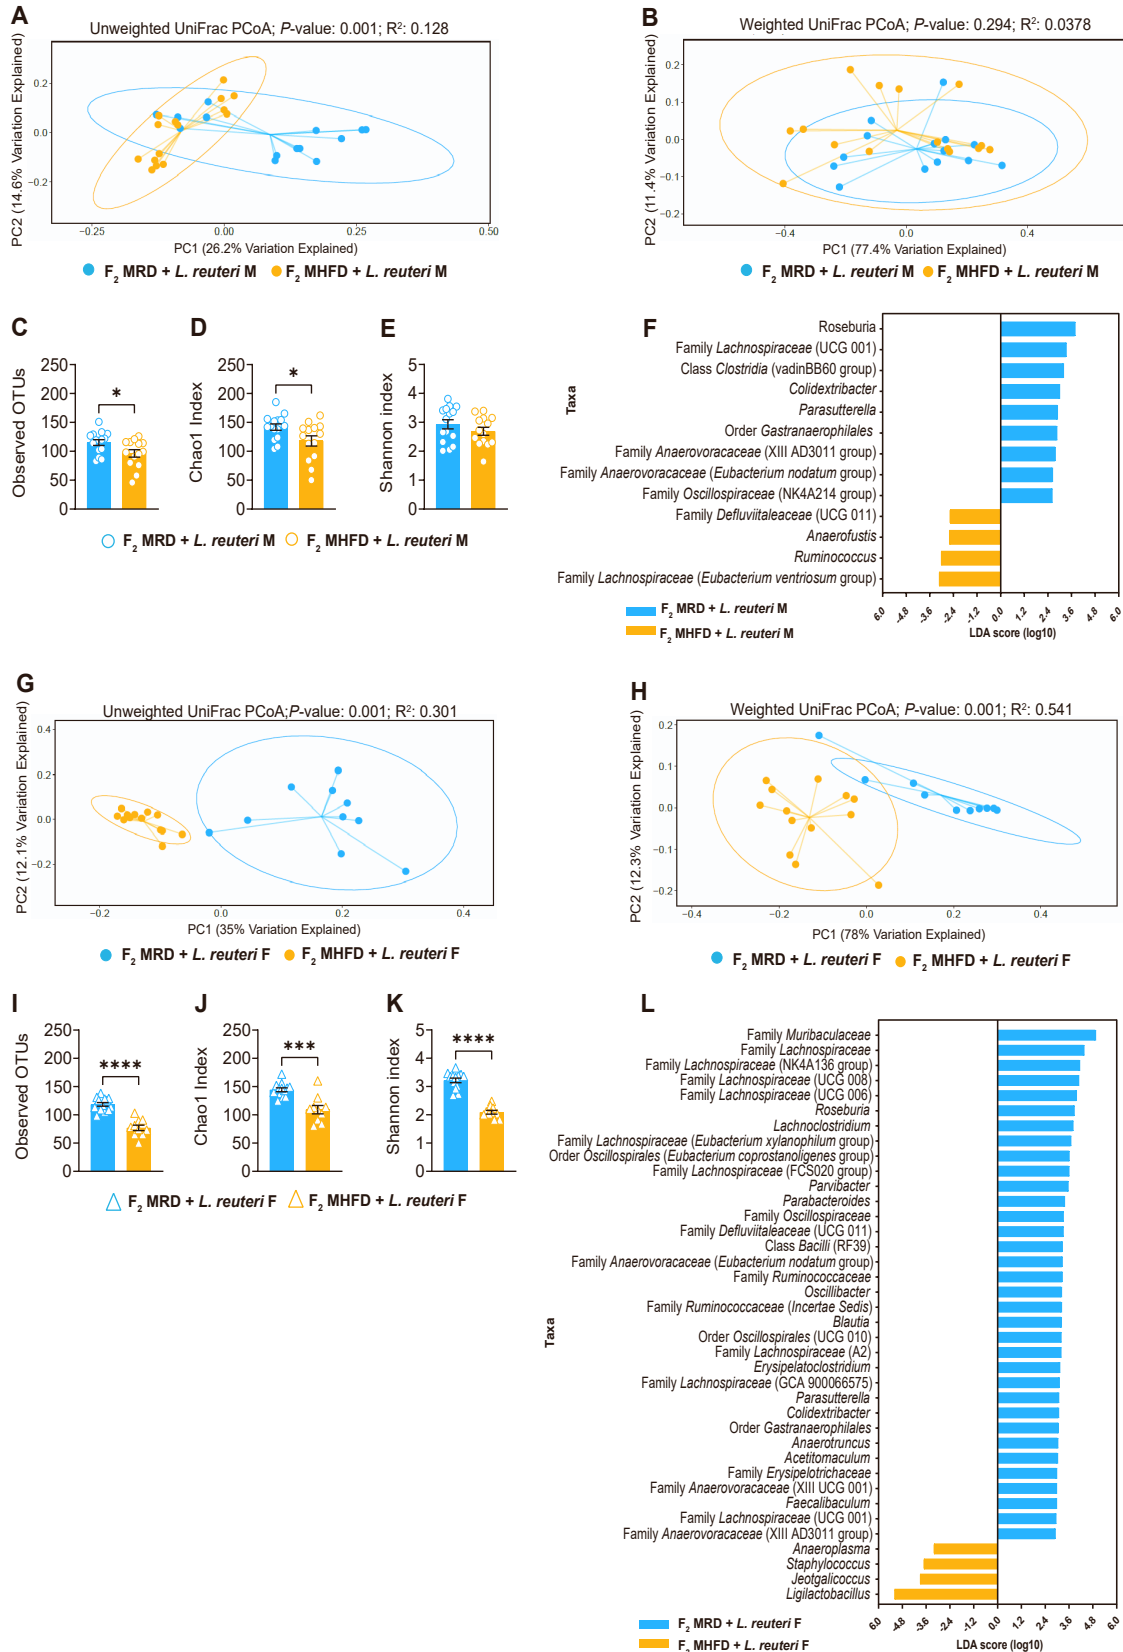

**Figure S7. F<sub>2</sub> microbiome remodeling in response to *L. reuteri* exhibits sex specificity, with females showing greater divergence between diet cohorts. Related to Figures 5 and 6. (A–B) Principal coordinate analysis (PCoA) of Unweighted (A), but not Weighted (B), UniFrac distances from the averaged rarefied 16S rRNA gene amplicon sequencing dataset (5,508 reads/sample; n=1,000 rarefactions) revealed statistically significant clusters based on diet (Unweighted UniFrac  $p = 0.001$ ,  $R^2 = 0.128$ ; Weighted UniFrac  $p = 0.294$ ,  $R^2 = 0.0378$ ) in F<sub>2</sub> male mice treated with *L. reuteri*. (C–E) Total number of OTUs (C) (MHFD F<sub>2</sub> + *L. reuteri* vs MRD F<sub>2</sub> + *L. reuteri*:  $t(27) = 2.331$ ,  $p = 0.0275$ ) and Chao1 index (D) (MHFD F<sub>2</sub> + *L. reuteri* vs MRD F<sub>2</sub> + *L. reuteri*:  $t(27) = 2.326$ ,  $p = 0.0278$ ), but not Shannon Index (E) (MHFD F<sub>2</sub> + *L. reuteri* vs MRD F<sub>2</sub> + *L. reuteri*:  $t(27) = 1.147$ ,  $p = 0.2613$ ), are decreased in *L. reuteri*-treated MHFD F<sub>2</sub> male offspring compared to MRD group. (F) Histogram of the LDA scores (log<sub>10</sub>) computed for genus-level taxa with differential abundance in *L. reuteri*-treated MHFD and MRD F<sub>2</sub> male offspring. (G–H) Principal coordinate analysis (PCoA) of Unweighted (G) and Weighted (H) UniFrac distances from the averaged rarefied 16S rRNA gene amplicon sequencing dataset (5,508 reads/sample; n=1,000 rarefactions) revealed statistically significant clusters based on diet (Unweighted UniFrac  $p = 0.001$ ,  $R^2 = 0.301$ ; Weighted UniFrac  $p = 0.294$ ,  $R^2 = 0.541$ ) in F<sub>2</sub> female mice treated with *L. reuteri*. (I–K) Total number of OTUs (I) (MHFD F<sub>2</sub> + *L. reuteri* vs MRD F<sub>2</sub> + *L. reuteri*:  $t(21) = 7.392$ ,  $p < 0.0001$ ), Chao1 index (J) (MHFD F<sub>2</sub> + *L. reuteri* vs MRD F<sub>2</sub> + *L. reuteri*:  $t(21) = 4.674$ ,  $p = 0.0001$ ), and Shannon Index (K) (MHFD F<sub>2</sub> + *L. reuteri* vs MRD F<sub>2</sub> + *L. reuteri*:  $t(21) = 10.25$ ,  $p < 0.0001$ ), are decreased in *L. reuteri*-treated MHFD F<sub>2</sub> female offspring compared to MRD group. (L) Histogram of the LDA scores (log<sub>10</sub>) computed for genus-level taxa with differential abundance in *L. reuteri*-treated MHFD and MRD F<sub>2</sub> female offspring. Bar graphs show mean  $\pm$  SEM with individual data points representing biological replicates. N = 10–15 subjects per group.**

Supplemental Figure 8 (Di Gesù, Matz et al.)

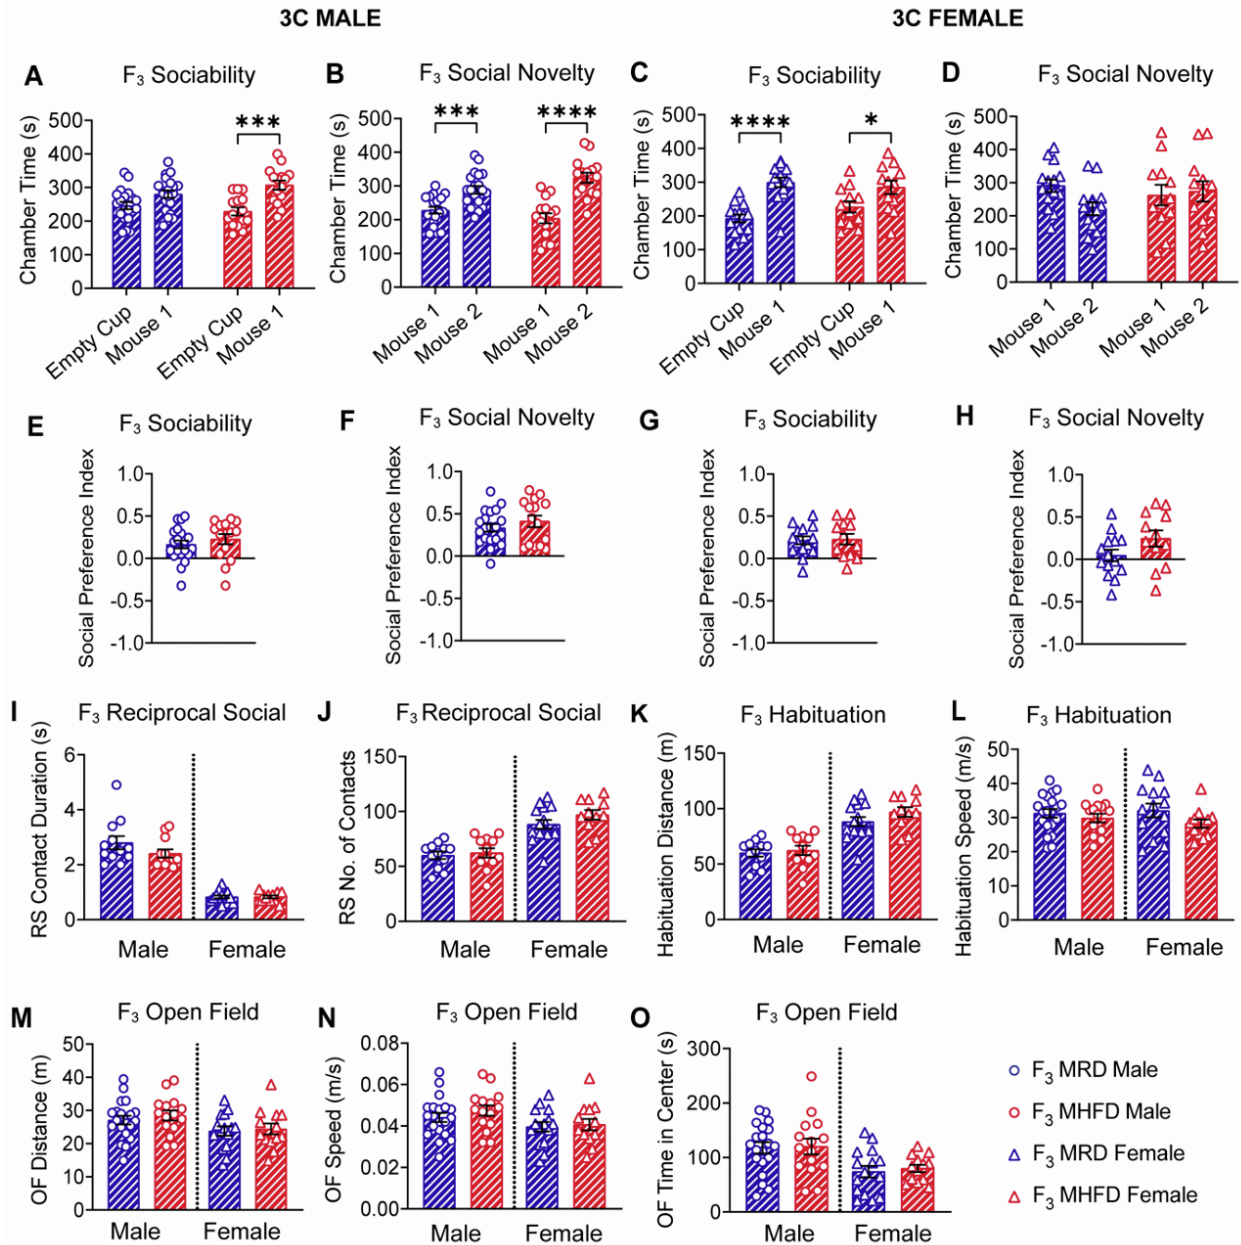

**Figure S8. Consistent with F<sub>2</sub>, MHFD-descendant F<sub>3</sub> mice do not display anxiety-like behavior or abnormal locomotor activity. Related to Figure 7.** 3C ANY-maze automated chamber times for F<sub>3</sub> (A, B) male and (C, D) female sociability (Male MRD F<sub>3</sub>:  $t(66) = 2.166$ ,  $p = 0.0667$ ; Male MHFD F<sub>3</sub>:  $t(66) = 4.299$ ,  $p < 0.0001$ ; Female MRD F<sub>3</sub>:  $t(48) = 5.050$ ,  $p < 0.0001$ ; Female MHFD F<sub>3</sub>:  $t(48) = 2.534$ ,  $p = 0.0290$ ) and social novelty (Male MRD F<sub>3</sub>:  $t(66) = 3.691$ ,  $p = 0.0009$ ; Male MHFD F<sub>3</sub>:  $t(66) = 6.330$ ,  $p < 0.00001$ ; Female MRD F<sub>3</sub>:  $t(48) = 2.038$ ,  $p = 0.0919$ ; Female MHFD F<sub>3</sub>:  $t(48) = 0.3118$ ,  $p = 0.9407$ ), respectively. Social Preference Index for (E, F) male and (G,

H) female sociability (Male MHFD vs MRD F<sub>3</sub>:  $t(8) = 0.8067$ ,  $p = 0.4432$ ; Female MHFD vs MRD F<sub>3</sub>:  $t(24) = 0.1777$ ,  $p = 0.8605$ ) and social novelty (Male MHFD vs MRD F<sub>3</sub>:  $t(33) = 0.9657$ ,  $p = 0.3412$ ; Female MHFD vs MRD F<sub>3</sub>:  $t(24) = 1.739$ ,  $p = 0.0949$ ). F<sub>3</sub> male and female reciprocal social (I) contact duration (Male MHFD vs MRD F<sub>3</sub> Mann-Whitney U=45.50,  $p = 0.2140$ ; Female MHFD vs MRD F<sub>3</sub>  $t(24) = 0.03989$ ,  $p = 0.9685$ ) and (J) number of contacts (Male MHFD vs MRD F<sub>3</sub>:  $t(22) = 0.4158$ ,  $p = 0.6816$ ; Female MHFD vs MRD F<sub>3</sub>:  $t(24) = 1.426$ ,  $p = 0.1668$ ). Neither male nor female 3C habituation (K) distance (Male MHFD F<sub>3</sub> vs MRD F<sub>3</sub>:  $t(8) = 0.4871$ ,  $p = 0.6392$ ; Female MHFD vs MRD F<sub>3</sub>:  $t(4) = 1.223$ ,  $p = 0.2885$ ) or (L) speed (Male MHFD vs MRD F<sub>3</sub>:  $t(8) = 0.5126$ ,  $p = 0.6221$ ; Female MHFD vs MRD F<sub>3</sub>:  $t(4) = 1.205$ ,  $p = 0.2947$ ) differ between diets. Open field (M) distance traveled (Male MHFD vs MRD F<sub>3</sub>:  $t(8) = 0.6214$ ,  $p = 0.5516$ ; Female MHFD vs MRD F<sub>3</sub>:  $t(4) = 0.2135$ ,  $p = 0.8414$ ), (N) speed (Male MHFD vs MRD F<sub>3</sub>:  $t(8) = 0.454$ ,  $p = 0.7860$ ; Female MHFD vs MRD F<sub>3</sub>:  $t(4) = 0.2161$ ,  $p = 0.8395$ ), and (O) time spent in center (Male MHFD vs MRD F<sub>3</sub>:  $t(8) = 0.04288$ ,  $p = 0.9668$ ; Female MHFD vs MRD F<sub>3</sub>:  $t(4) = 0.3881$ ,  $p = 0.7177$ ) are not statistically different between cohorts. Bar graphs show mean  $\pm$  SEM with individual data points representing biological replicates. A–H, K, and L, N = 12–20 subjects per group; I and J, N = 12–15 pairs per group; M and O, N = 13–20 subjects per group.
